# Supplementary material
Source: MDPI journal article supplement (https://www.mdpi.com/2076-3263/11/9/395)
Supplement: s1 [file s1]

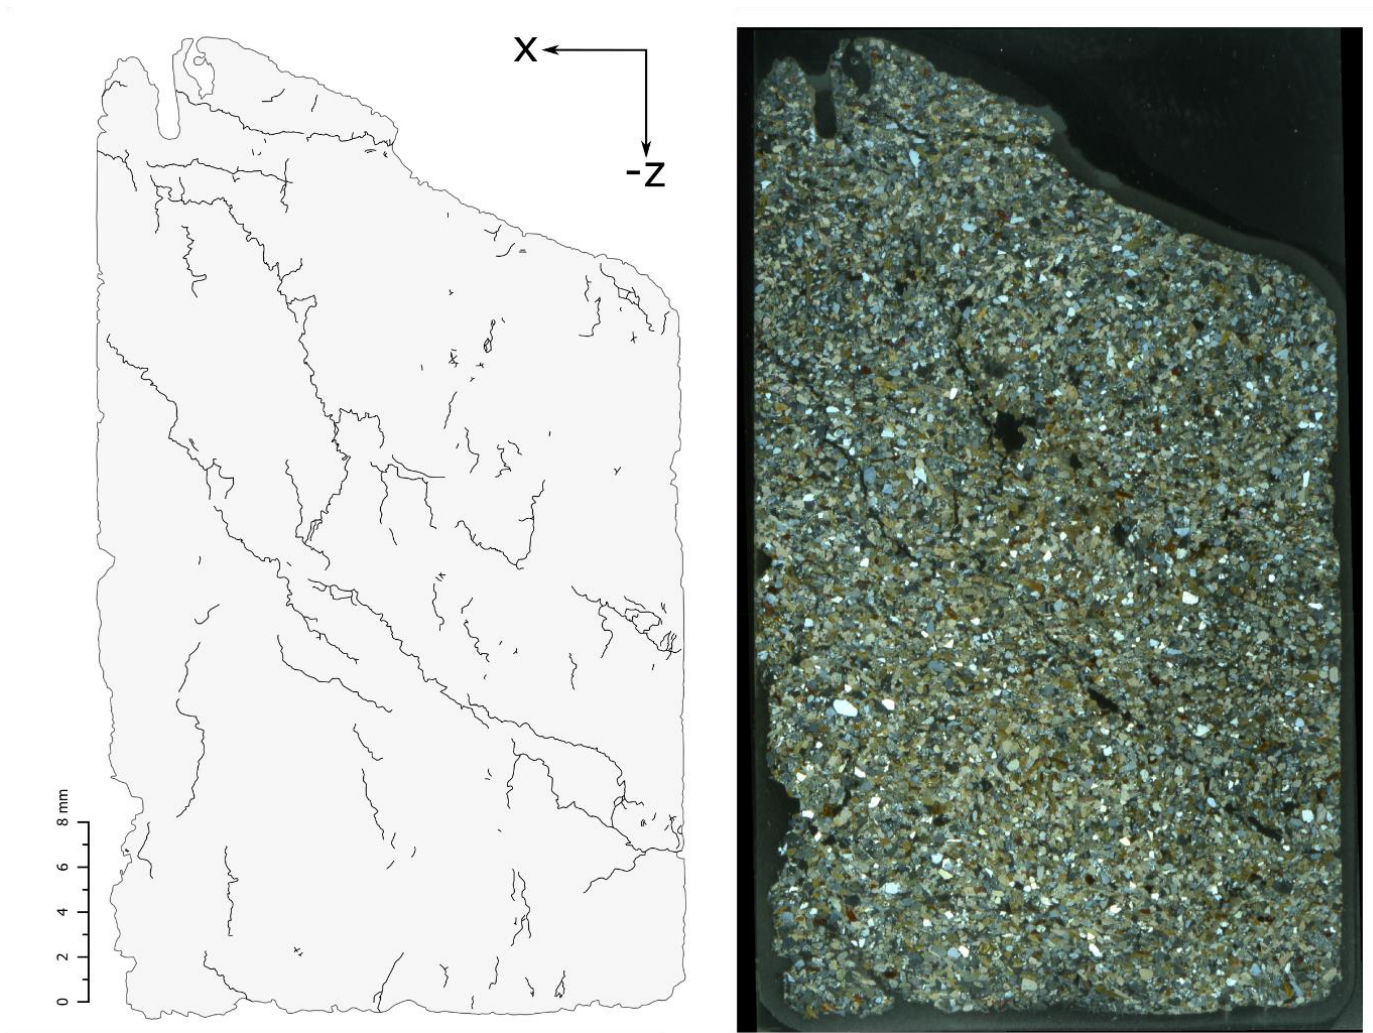

**Figure S1:** Fracture map (left) used in analysis of  $P_{xy}$  values and cross polar photomicrograph (right) of section HS\_IC\_5P.

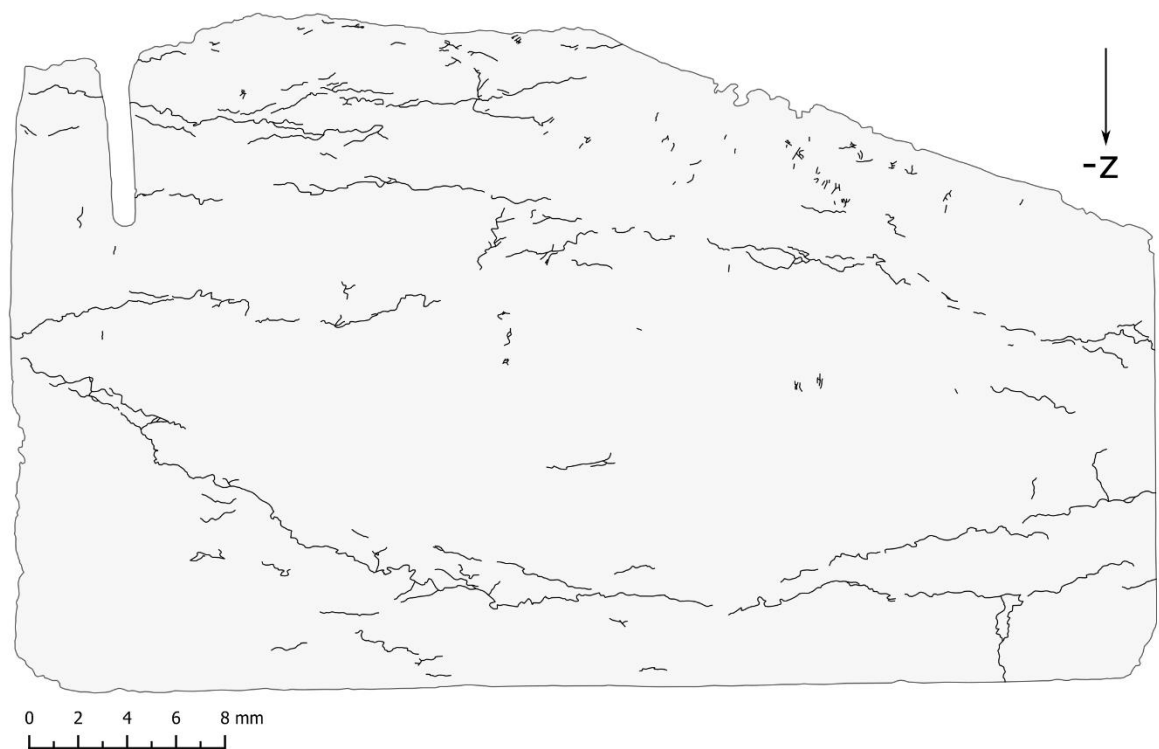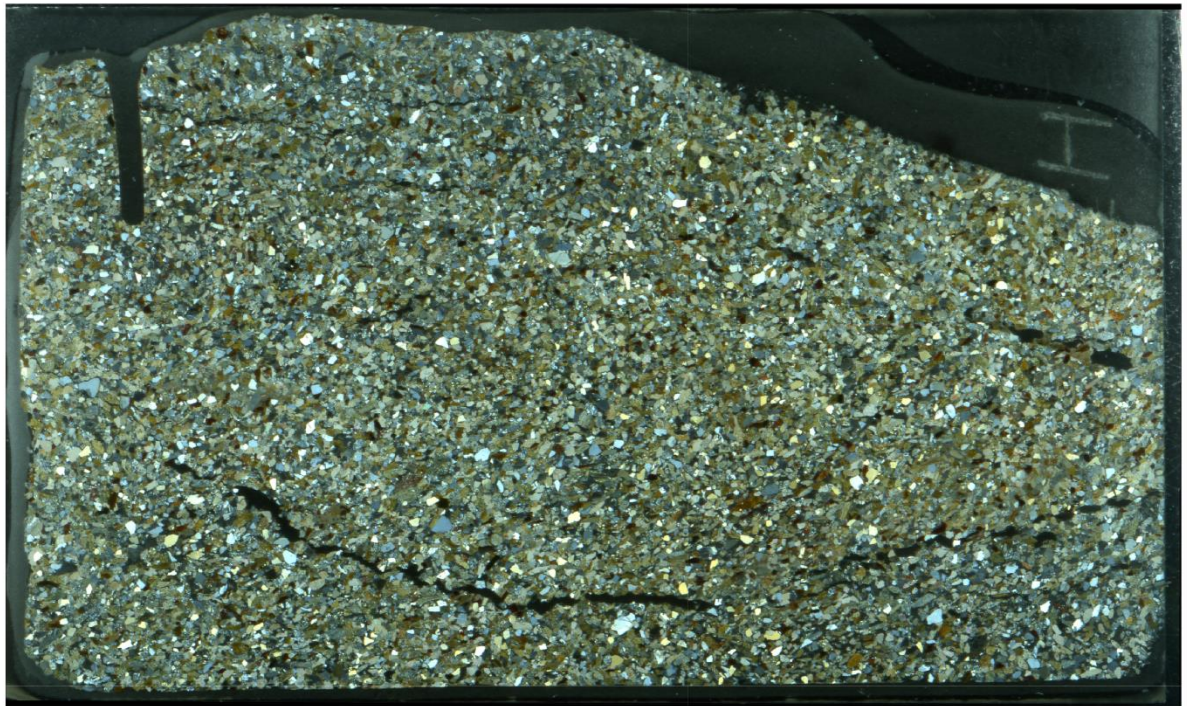

**Figure S2:** Fracture map (top) used in analysis of  $P_{xy}$  values and cross polar photomicrograph (lower) of section HS\_IC\_RP.



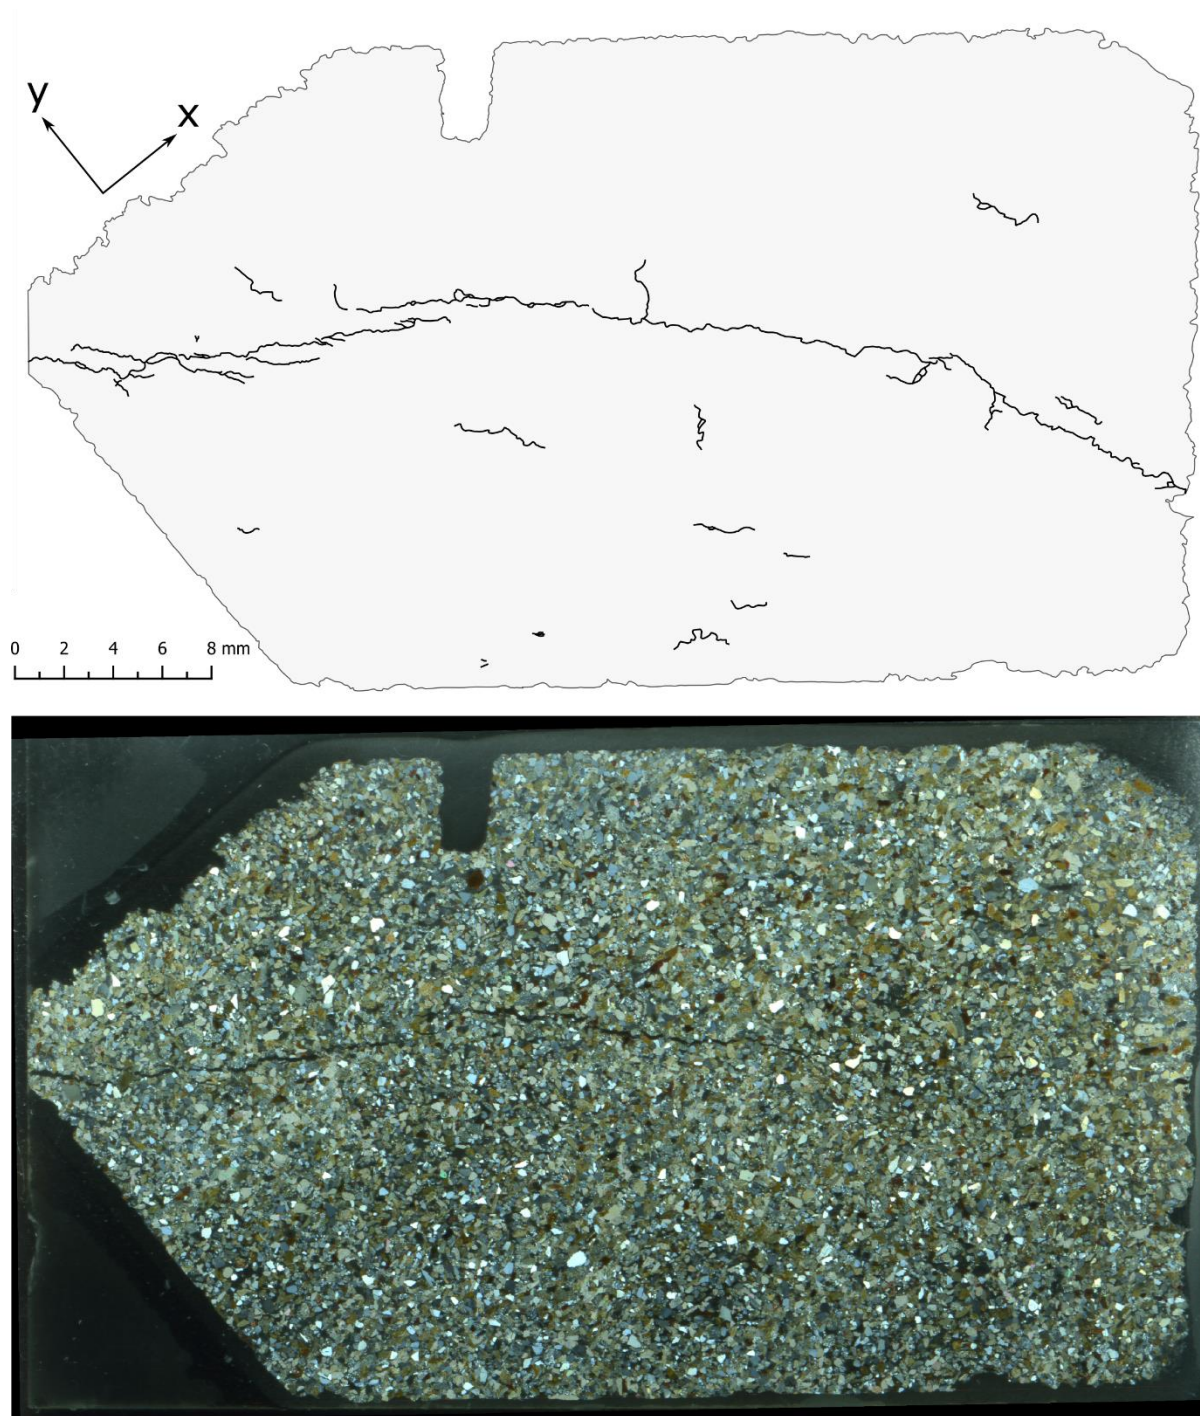

**Figure S3:** Fracture map (top) used in analysis of  $P_{xy}$  values and cross polar photomicrograph (lower) of section HS\_RF\_1P.

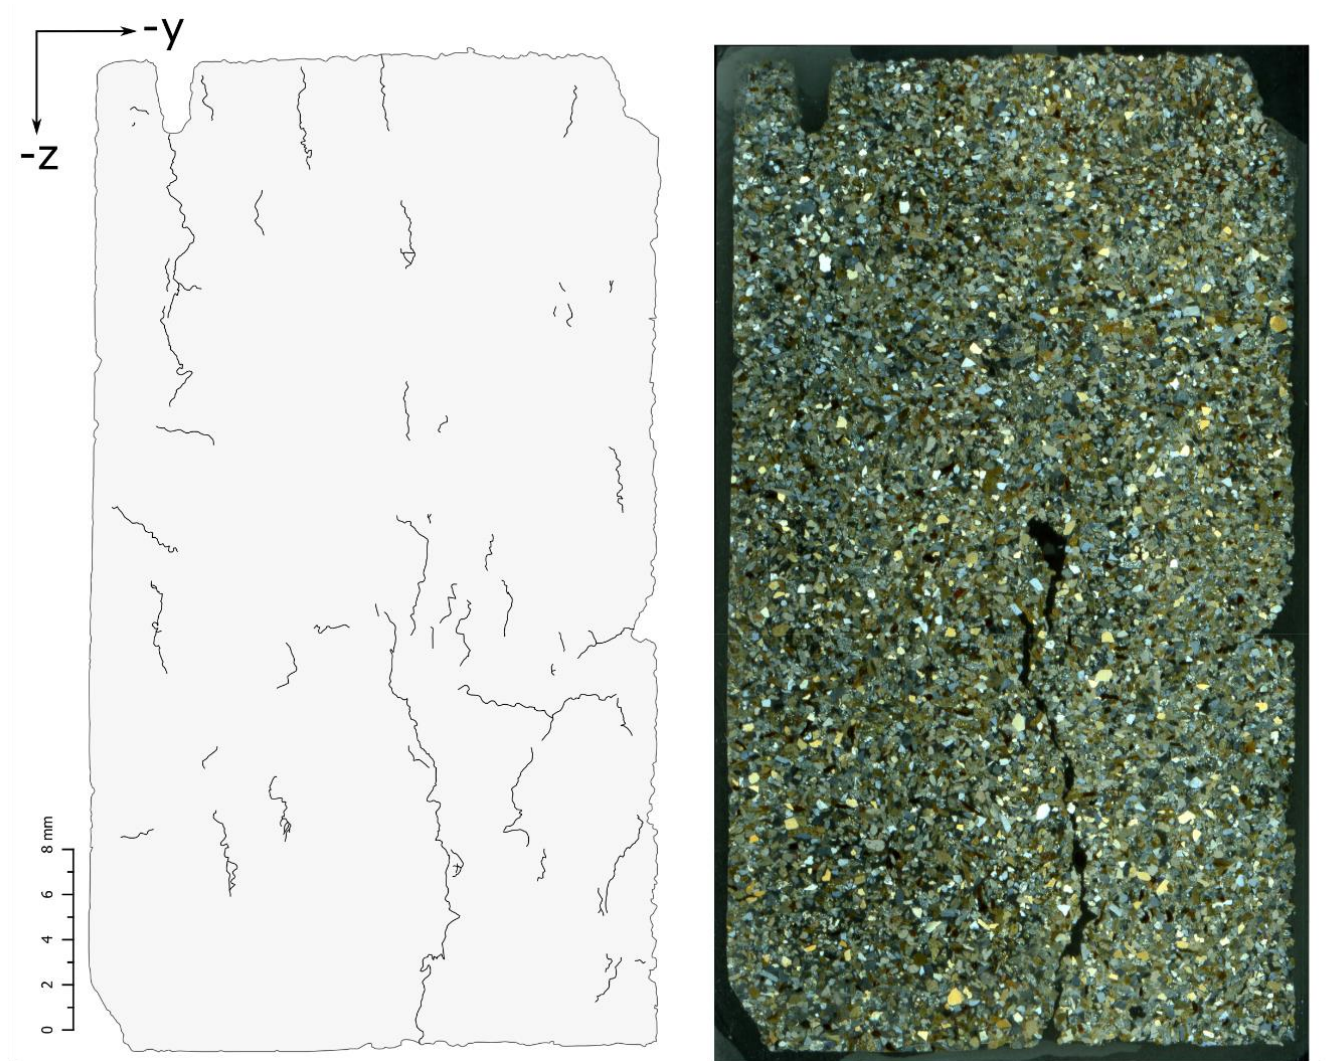

**Figure S4:** Fracture map (left) used in analysis of  $P_{xy}$  values and cross polar photomicrograph (right) of section HS\_RF\_2P.



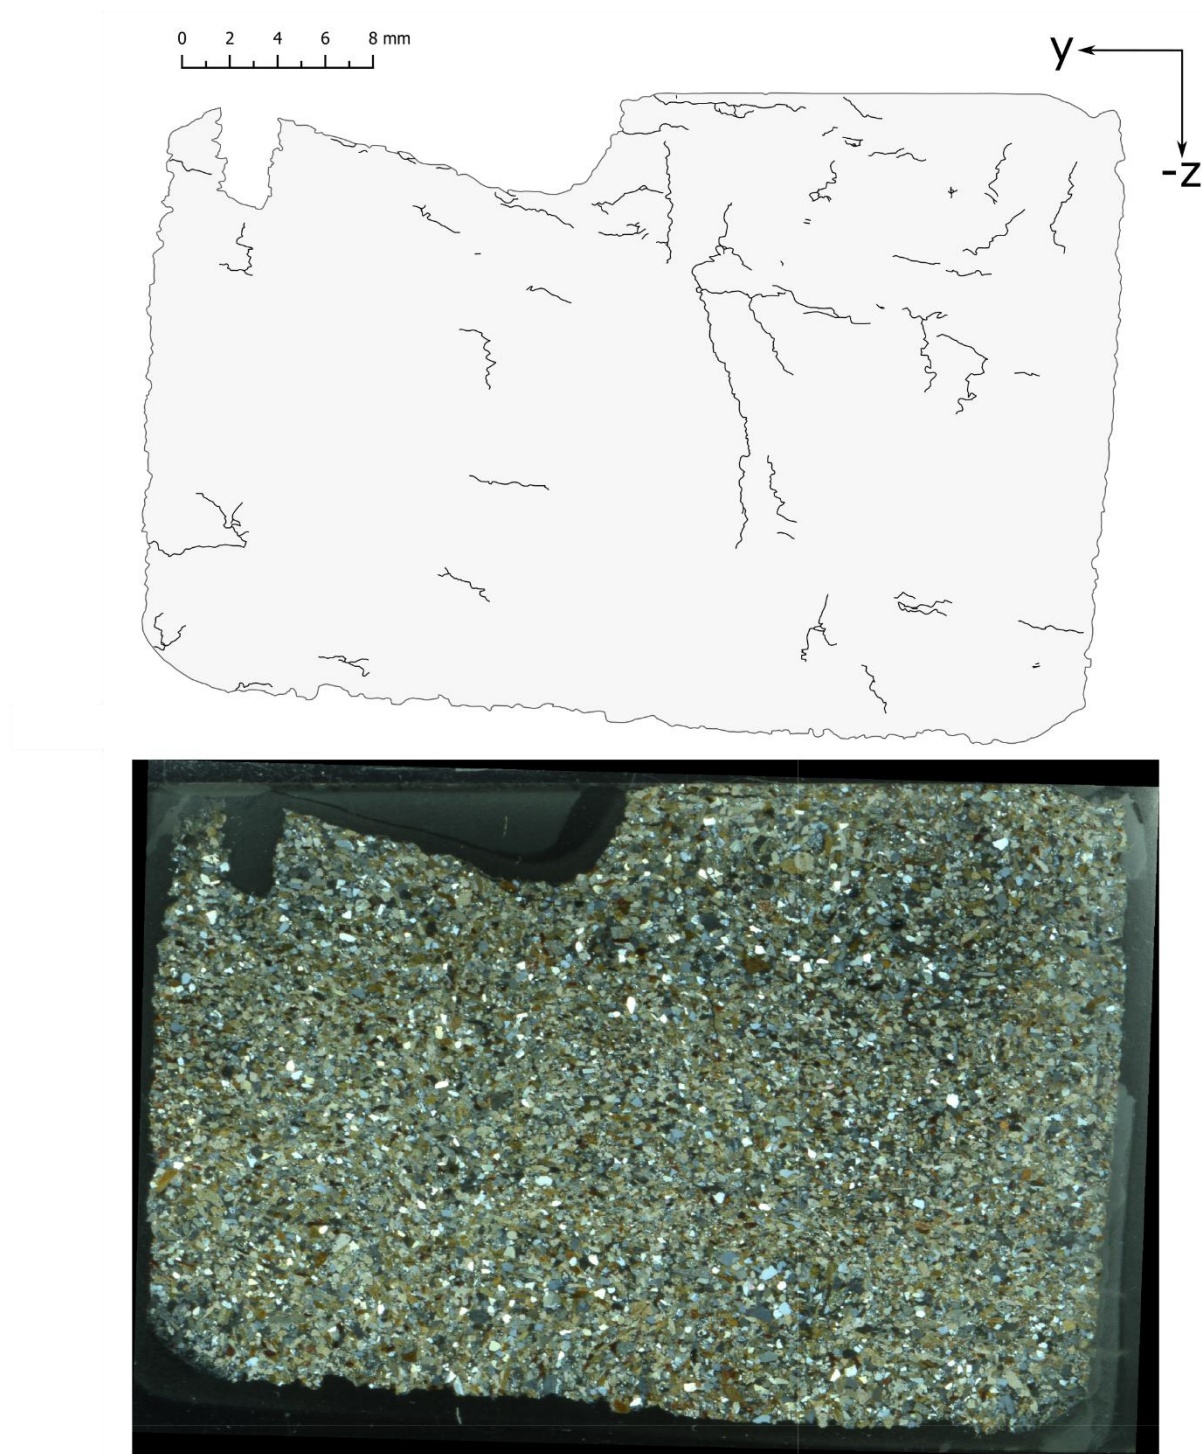

**Figure S5:** Fracture map (top) used in analysis of  $P_{xy}$  values and cross polar photomicrograph (lower) of section HS\_FS\_4P.

**Figure S6:** 3D render of target block showing the minimum extent of internal fractures (orange planes).

**Table S1:** Spreadsheet of raw data from the facet and surface trace analysis.
